# A role for Q/N-rich aggregation-prone regions in P-body localization

Martin A. M. Reijns\*, Ross D. Alexander, Michael P. Spiller<sup>‡</sup> and Jean D. Beggs<sup>§</sup>

Wellcome Trust Centre for Cell Biology, University of Edinburgh, King's Buildings, Mayfield Road, Edinburgh EH9 3JR, UK

\*Present address: Medical Research Council, Human Genetics Unit, Western General Hospital, Crewe Road, Edinburgh EH4 2XU, UK

<sup>‡</sup>Present address: Faculty of Life Sciences, Michael Smith Building, University of Manchester, Oxford Road, Manchester M13 9PT, UK

<sup>§</sup>Author for correspondence (email: jbeggs@ed.ac.uk)

Accepted 14 May 2008

Journal of Cell Science 121, 2463-2472 Published by The Company of Biologists 2008

doi:10.1242/jcs.024976

## Summary

**P-bodies are cytoplasmic foci that are sites of mRNA degradation and translational repression. It is not known what causes the accumulation of RNA-degradation factors in P-bodies, although RNA is required. The yeast Lsm1-7p complex (comprising Lsm1p to Lsm7p) is recruited to P-bodies under certain stress conditions. It is required for efficient decapping and degradation of mRNAs, but not for the assembly of P-bodies. Here we show that the Lsm4p subunit and its asparagine-rich C-terminus are prone to aggregation, and that this tendency to aggregate promotes efficient accumulation of Lsm1-7p in P-bodies. The presence of glutamine- and/or asparagine-rich (Q/N-rich) regions in other P-body components**

**suggests a more general role for aggregation-prone residues in P-body localization and assembly. This is supported by reduced P-body accumulation of Ccr4p, Pop2p and Dhh1p after deletion of these domains, and by the observed aggregation of the Q/N-rich region from Ccr4p.**

Supplementary material available online at <http://jcs.biologists.org/cgi/content/full/121/15/2463/DC1>

Key words: P-body localization, Protein aggregation, Q/N-rich domains, Stress

## Introduction

Cytoplasmic mRNA-processing bodies (P-bodies) contain a variety of protein factors, some of which are involved directly in decapping (Dcp1p, Dcp2p), some in translational repression and/or activation of decapping (Pat1p, Dhh1p, Edc1p, Edc2p, Edc3p, Scd6p) and others are involved in deadenylation (Ccr4p, Pop2p, Not1p, Not2p, Not3p, Not4p, Not5p, Pan2p, Pan3p) or 5' to 3' degradation (Xrn1p). In addition, factors involved in nonsense-mediated decay and RNA interference (e.g. Ago1) are present in these foci (reviewed by Parker and Sheth, 2007). P-bodies in higher eukaryotes have also been called GW bodies after GW182 (also known as TNRC6A) (Eystathiou et al., 2003), a component that is required for their integrity (Liu et al., 2005), and which has a function in miRNA-mediated silencing (Jakymiw et al., 2005; Liu et al., 2005; Rehwinkel et al., 2005). In budding yeast, a cytoplasmic complex that consists of Lsm1p, Lsm2p, Lsm3p, Lsm4p, Lsm5p, Lsm6p and Lsm7p (hereafter referred to as Lsm1-7p), and which is involved in mRNA decapping and subsequent 5' to 3' decay (Bouveret et al., 2000; Tharun et al., 2000), localizes to P-bodies under certain stress conditions (Sheth and Parker, 2003; Teixeira et al., 2005). In higher eukaryotes, the equivalent of Lsm1-7p is present in similar foci, even under normal growth conditions (Ingelfinger et al., 2002; Eystathiou et al., 2003; Cougot et al., 2004). Lsm1-7p is thought to act as a chaperone, remodelling transcript-containing ribonucleoprotein particles (RNPs) at a step following deadenylation, thus promoting decapping (Tharun et al., 2000).

In yeast, no single protein component is responsible for P-body assembly but there is a level of interdependence in the recruitment of some of the components to these foci (Teixeira and Parker, 2007). By contrast, in human cells depletion of many components, with the notable exception of XRN1 and DCP2, affects localization of the others (reviewed by Jakymiw et al., 2007), suggesting that most

components involved in early, but not late stages of mRNA decay are essential for P-body assembly. It is not known what makes any of these factors concentrate in cytoplasmic foci, although in yeast this seems to require RNA (Teixeira et al., 2005). More recently, various proteins in budding yeast have been implicated directly in P-body assembly, and the understanding of their physical and functional interactions is gathering pace. This includes Edc3p, Lsm4p (Decker et al., 2007), Pat1p (Pilkington and Parker, 2008), and Ded1p (Beckham et al., 2008).

*LSM4* of *Saccharomyces cerevisiae* encodes an essential protein of 187 amino acids (aa). It is one of the seven subunits of the Lsm1-7p and Lsm2-8p (comprising Lsm2p to Lsm8p) complexes, the latter of which is needed for efficient pre-mRNA splicing through its role in U6 small nuclear RNA (snRNA) stability (Achsel et al., 1999; Mayes et al., 1999; Pannone et al., 1998; Salgado-Garrido et al., 1999) and localization (Spiller et al., 2007a) as well as U4/U6 dissnRNP formation (Verdone et al., 2004). The N-terminal 92 aa of Lsm4p include the Sm domain, which is involved in protein-protein and protein-RNA interactions within the Lsm complexes (Cooper et al., 1995; Hermann et al., 1995; Séraphin, 1995). This region is highly conserved between *Saccharomyces* species (Fig. 1A), and between budding yeast and humans (Fig. 1B). The C-terminal 95 aa are rich in asparagine (N; 36%) and serine (S; 17%), giving this region a highly hydrophilic character. It is less conserved than the N-terminus, however, homologues from various *Saccharomyces* species contain similar asparagine-rich stretches that vary in length and position. A notable exception is Lsm4p from *S. kluyveri* that has a glutamine (Q)-rich region (Fig. 1A). This N and/or Q-rich character of the Lsm4p C-terminus is conserved throughout the budding yeasts (supplementary material Fig. S1). By contrast, most Lsm4p homologues from higher organisms have an abundance of arginine and glycine residues in their C-termini, often in the form

of RG repeats (Fig. 1B and supplementary material Fig. S2), that are important for interactions with the SMN complex. Symmetrical dimethylation of the arginine residues is thought to be important for regulation of snRNP assembly (Braahms et al., 2001; Paushkin et al., 2002). *S. cerevisiae* does not have a known SMN complex equivalent, providing a possible explanation for the absence of RG repeats in yeast Lsm4p. Experiments with Lsm4p of *Kluyveromyces lactis* suggest that the Lsm4p C-terminus is needed for efficient RNA degradation (Mazzoni et al., 2003a; Mazzoni et al., 2003b).

Here we describe the role of yeast Lsm4p and its C-terminus in Lsm protein aggregation. We show that the ability of Lsm4p to aggregate, although not essential, promotes efficient accumulation of Lsm1-7p in P-bodies. Many other P-body components contain Q/N-rich regions suggestive of a more general role for such aggregation-prone residues in efficient accumulation of these factors in P-bodies. In support of this hypothesis we show that the Q/N-rich region of Ccr4p is prone to aggregation under normal growth conditions and shows increased focal localization under stress conditions. Furthermore, we show that the Q/N-rich region of Ccr4p is essential for its accumulation in microscopically visible P-bodies,

whereas those of Pop2p and Dhh1p, although not essential for P-body localization, promote their efficient accumulation in these cytoplasmic foci.

## Results and Discussion

**Overproduced Lsm4p or its C-terminus accumulate in foci**  
While investigating the localization of various GFP-Lsm4p fusions, we observed that GFP fused to full-length Lsm4p (GFP-Lsm4) or to its C-terminus (GFP-Lsm4C; aa 92-187) accumulates in cytoplasmic foci as well as in larger aggregates, in a variable percentage of cells (10-60%), whereas GFP fused to the N-terminal half of Lsm4p (GFP-Lsm4ΔC; aa 1-92), containing the Sm domain, does not (Fig. 2A). The number of GFP-Lsm4 foci increases after hypo-osmotic shock, indicating that aggregation can be triggered by stress, and that these newly formed foci are probably P-bodies. This is confirmed by colocalization of Dcp2-RFP with GFP-Lsm4p in foci formed after stress. By contrast, Dcp2-RFP is not particularly enriched in the larger Lsm4p aggregates during log-phase growth, suggesting that these are probably not P-bodies (Fig. 2B). In cells expressing GFP-Lsm4ΔC as the only copy of Lsm4p, Dcp2-RFP localizes to foci after osmotic shock, showing that P-bodies are formed (Fig. 2B). However, GFP-Lsm4ΔC localizes throughout the cell, indicating its failure to accumulate in P-bodies even under stress conditions. The virtual absence of GFP-Lsm4ΔC in microscopically visible P-bodies is not due to reduced levels of this truncated protein, as shown by western analysis (see below).

### Other Lsm proteins aggregate upon Lsm4p overproduction

To investigate a potential link between these Lsm4p aggregates and P-bodies, the presence of other proteins was examined. We observed accumulation of all tested GFP-tagged Lsm proteins (Lsm1p, Lsm2p, Lsm6p, Lsm7p and Lsm8p) in similar cytoplasmic aggregates during log-phase growth of cells overproducing non-tagged Lsm4p (*P<sub>GAL</sub>-LSM4* strain grown on galactose; Fig. 2C and supplementary material Fig. S3). This was even the case with the normally nuclear Lsm8p, indicating that not only Lsm1-7p but also Lsm2-8p aggregates when Lsm4p is present at high levels. Aggregates were observed mostly in the cytoplasm and occasionally in the nucleolus, judging from colocalization with the nucleolar protein Nop1p (data not shown). By contrast, normal localization was observed for each of the Lsm proteins in the absence of excess Lsm4p (Fig. 2C), although each of these GFP-tagged proteins was moderately overexpressed from the *MET25* promoter. Lsm protein aggregates are therefore likely to be not physiologically significant, but simply the result of aggregation of Lsm4p-containing complexes when Lsm4p is present at higher than normal levels. As aggregation was observed with direct interaction partners of Lsm4p in the ring-shaped Lsm complex (Lsm1p, Lsm2p and Lsm8p) as well as with physically more distant subunits (Lsm6p and Lsm7p) it seems possible that overexpressed Lsm4p drives the aggregation of entire Lsm1-7p and Lsm2-8p complexes, probably via its C-terminus. This aggregation is specific to the Lsm proteins, as GFP alone localized throughout the cells regardless of Lsm4p levels (Fig. 2C), and the

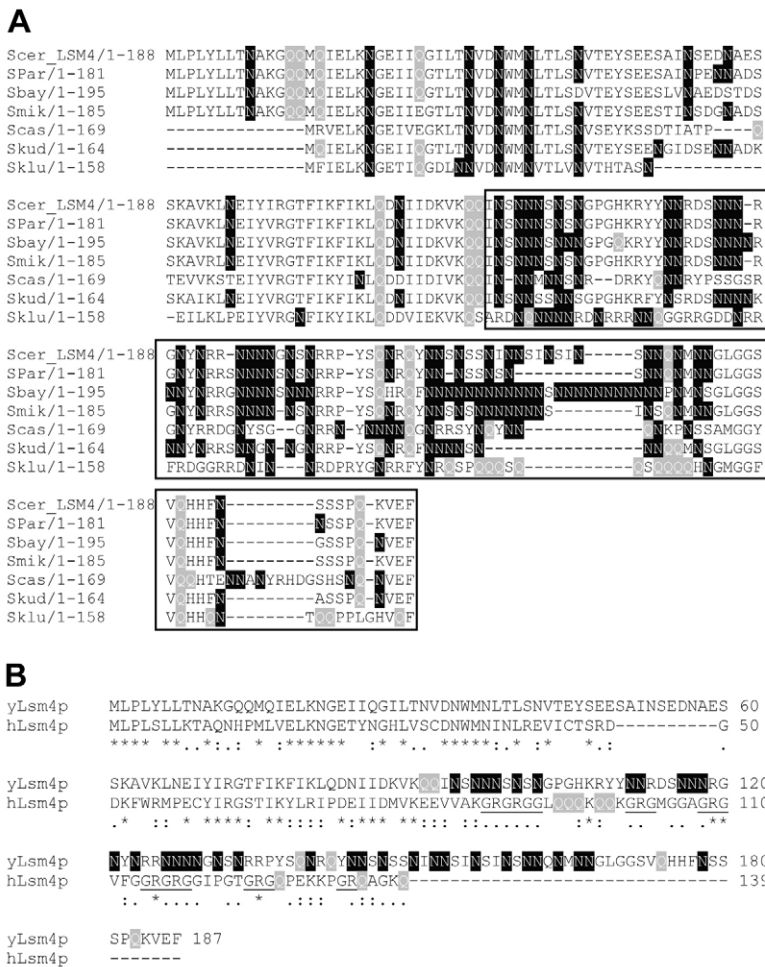

**Fig. 1** Lsm4p has an N-rich C-terminal region. (A) The N-terminus of Lsm4p (aa 1-92) contains the Sm domain; the C-terminus (aa 93-187; boxed) contains N-rich (or Q-rich) stretches of variable lengths. Scer, *S. cerevisiae*; SPar, *S. paradoxus*; Sbay, *S. bayanus*; Smik, *S. mikatae*; Scas, *S. castellii*; Skud, *S. kudriavzevii*; Sklu, *S. kluyveri*. (B) Lsm4 protein alignment of the budding yeast (yLsm4p) and the human (hLsm4p) protein. Sequences were aligned using ClustalW. Q residues are highlighted in grey, N residues in black and RG (arginine-glycine) repeats are underlined.

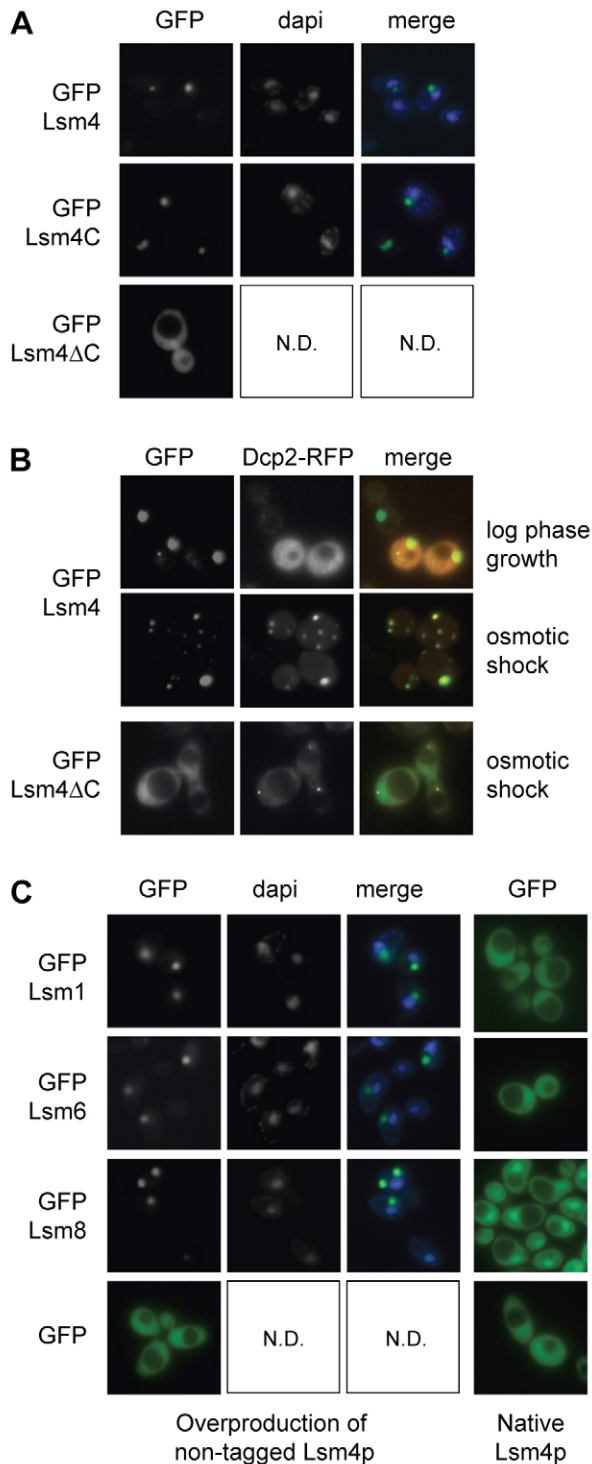

**Fig. 2** Overproduction of Lsm4p or its C-terminus leads to aggregation in cytoplasmic foci. (A) GFP-Lsm4 (pMPSLsm4), GFP-Lsm4C (pMPSLsm4D2) and GFP-Lsm4ΔC (pMPSLsm4D1) were overexpressed from the *MET25* promoter in BY4741 cells grown in SD-Ura-Met. Localization was examined in cells during log-phase growth. (B) Colocalization of Lsm4p aggregates with Dcp2-RFP (pRP1155) was examined in BY4741 cells grown in SD-Ura-Leu-Met during log-phase growth or 20 minutes after hypo-osmotic shock. Dcp2-RFP (pMR171) localization was examined in *P<sub>GAL</sub>-LSM4* cells expressing GFP-Lsm4ΔC grown in SD-Ura-His-Met (to prevent competition between GFP-Lsm4ΔC and endogenous Lsm4p for incorporation into Lsm1-7p), 20 minutes after hypo-osmotic shock. (C) Localization of GFP-Lsm1 (pGFP-N-Lsm1), GFP-Lsm6 (pMPSLsm6), Lsm8-GFP (pMR83) and GFP (pGFP-N-FUS) was examined in log-phase cells overproducing Lsm4p (*P<sub>GAL</sub>-LSM4* cells grown in SDGal-Ura) and in cells with normal levels of Lsm4p (*P<sub>GAL</sub>-LSM4* cells with pUSS1 grown in SD-Ura-Met). Nuclear DNA stained with DAPI is shown in blue.

stress conditions, suggests a role for the Lsm4p C-terminus in targeting Lsm1-7p to P-bodies. As a complete Lsm1-7p complex is apparently needed for localization to P-bodies (Ingelfinger et al., 2002; Tharun et al., 2005) the C-terminal deletion is likely to affect localization of the entire Lsm1-7p complex. The localization of GFP-Lsm1 to P-bodies was therefore examined in cells producing either Lsm4p or Lsm4ΔCp (both non-tagged) from the native *LSM4* promoter (i.e. not overproduced). In comparison with the accumulation of GFP-Lsm1 in P-bodies (for colocalization of GFP-Lsm1 with Dcp2-RFP see supplementary material Fig. S4) following hypo-osmotic stress of *LSM4* cells, there was a reduction in the intensity of GFP-Lsm1 foci that formed in *lsm4ΔC* cells (Fig. 3A), as well as an apparent delay in their formation. To quantify this delay, the number of cells that displayed visible P-bodies 5 minutes and 1 hour after hypo-osmotic shock was counted in the *LSM4* and *lsm4ΔC* strains. Whereas 85% of *LSM4* cells displayed foci 5 minutes after hypo-osmotic shock, with only a small increase (to 90%) after 1 hour, only 4% of *lsm4ΔC* cells displayed foci after 5 minutes, increasing to 73% after 1 hour (Fig. 3B), with the majority of these foci still weaker than those observed in *LSM4* cells. The localization of GFP-Lsm2 and GFP-Lsm6 to P-bodies after hypo-osmotic stress was similarly reduced in the *lsm4ΔC* strain compared with the *LSM4* strain (Fig. 3C,D). Taken together, these data strongly suggest that the C-terminal domain of Lsm4p although not actually essential, is nevertheless important for efficient accumulation of Lsm1-7p in P-bodies under stress conditions. As the Lsm4p C-terminal domain seems to be important for efficient recruitment of Lsm1-7p to P-bodies, the C-terminal deletion might also have an effect on the accumulation of other proteins in P-bodies. However, no significant effect was seen on the localization of either Dcp1p or Dcp2p to P-bodies (Fig. 3E, and data not shown).

#### Detrimental effects of GFP-tagging Lsm4ΔCp

The complete absence of GFP-Lsm4ΔC from P-bodies after osmotic shock seems to contradict the mere reduction in P-body accumulation of GFP-Lsm1, Lsm2 and Lsm6 in the *lsm4ΔC* (non-tagged) strain. However, upon closer inspection, GFP-Lsm4ΔC was observed to localize weakly to P-bodies after hypo-osmotic shock in a small fraction of cells (<1%), and to accumulate in cytoplasmic foci in more than 90% of cells grown into late stationary phase (data not shown). Its reduced accumulation in P-bodies is likely to reflect negative effects of the GFP-tag in combination with the C-terminal deletion, possibly by reducing its incorporation into the Lsm1-7p complex. The negative effect

exclusively nuclear Lhp1p fused with GFP remained nuclear under these conditions and did not form aggregates, although many cells showed abnormal nuclear morphology, which is a phenotype associated with Lsm4p overproduction (supplementary material Fig. S3).

#### A role for Lsm4p in Lsm1-7p P-body localization

The accumulation of GFP-Lsm4 and GFP-Lsm4C in foci when overexpressed, and failure of GFP-Lsm4ΔC to aggregate even under

of the GFP-tag is emphasized by a slow growth defect of the *GFP-Lsm4ΔC* strain at all temperatures compared with the *lsm4ΔC* strain (with non-tagged protein expressed from its native promoter), which shows slower growth only at 37°C (supplementary material Fig. S5). We cannot formally rule out the possibility that the difference between the non-tagged *lsm4ΔC* and the *GFP-Lsm4ΔC* strains is caused by their different levels of expression (native promoter vs *MET25* promoter), although this is more likely to lead to the opposite of what we observe. While this manuscript was in preparation Mazzoni et al. reported that the asparagine-rich N-terminal region of the *K. lactis* Lsm4 protein, kLsm4p, which is able to functionally replace its *S. cerevisiae* homologue, is essential for its own localization to P-bodies in budding yeast (Mazzoni et al., 2007). However, these authors only investigated the localization of a GFP-tagged version of this protein, and not the localization of other Lsm proteins in a strain expressing non-tagged kLsm4ΔCp. Thus the effect of the deletion may not have been distinguished from the additional, detrimental effect of the tag.

#### Absence of the Lsm4p

##### C-terminus affects mRNA decay

To determine whether the Lsm4p C-terminal deletion affects mRNA decay, degradation of a PGK1pGmini reporter transcript (Mitchell and Tollervey, 2003) was investigated. This reporter is expressed from the *GAL1* promoter, allowing its transcription to be switched off by growth on glucose. The rate of subsequent disappearance of the reporter transcript is used as a measure of its 5' to 3' degradation through the major mRNA decay pathway. A small effect was observed, as the mRNA half life increased from 3.4±0.9 minutes in wild type to 4.7±1.1 minutes in the *lsm4ΔC* strain, on the basis of the quantitative reverse-transcriptase PCR (qRT-PCR) data presented in Fig. 4C. Half lives calculated using data obtained from the northern blot were slightly higher compared with those determined by qRT-PCR, but the relative difference between the two strains was similar. In addition, the steady-state level of this transcript appears to be about 40% higher in the *lsm4ΔC* cells compared with the *LSM4* cells (Fig. 4B). By contrast, no effect was observed on the splicing of pre-U3 RNA, compared with 12 hours of Lsm8p depletion (Fig. 4D), suggesting that Lsm4ΔCp does not detrimentally affect formation of Lsm2-8p or stability of U6 snRNA. It therefore seems unlikely that the stability or formation

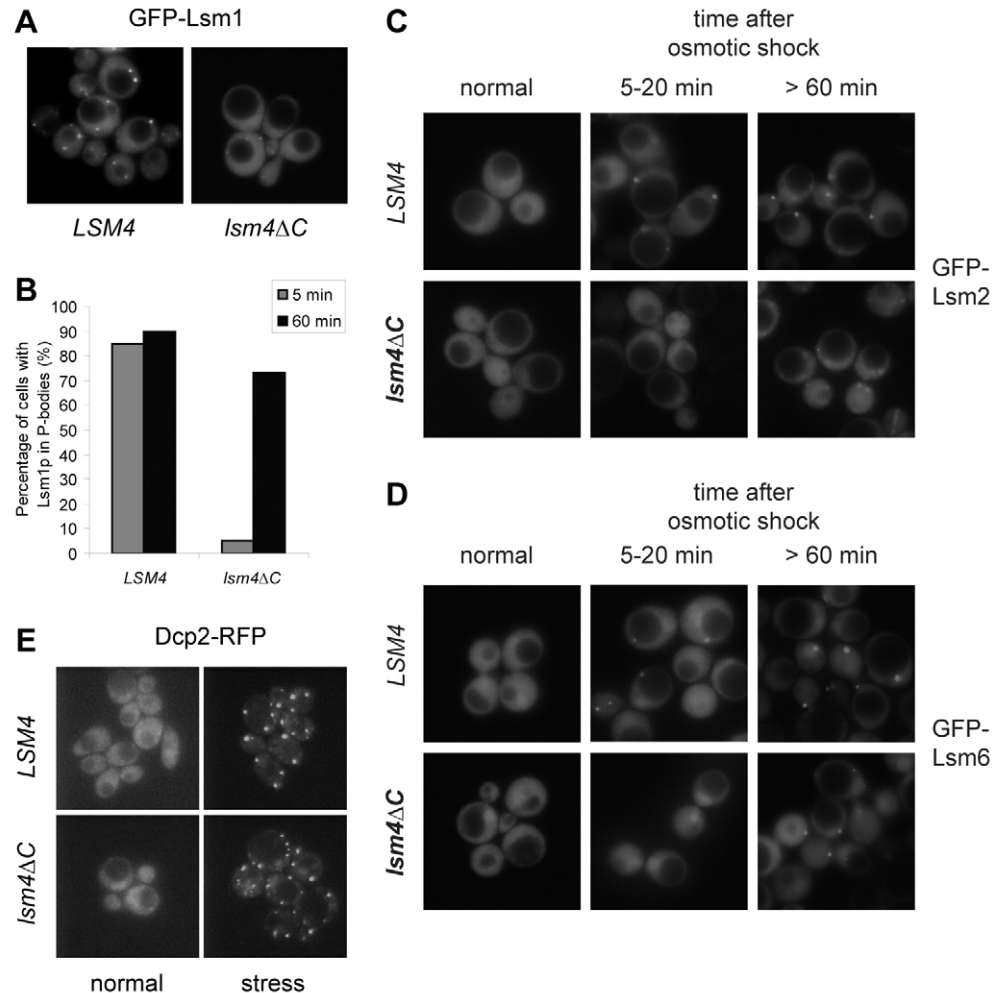

**Fig. 3** The Lsm4 C-terminus is required for efficient localization of Lsm1p to P-bodies. (A) GFP-Lsm1 (pGFP-N-Lsm1) localization 20 minutes after hypo-osmotic shock in *LSM4* (MRY71) or *lsm4ΔC* (MRY73) cells. (B) Percentage of cells showing GFP-Lsm1 in foci 5 minutes or 1 hour after osmotic shock ( $n=100$  cells per time point). (C,D) Localization of GFP-Lsm2 (pMPSLsm2) (C) and GFP-Lsm6 (pMPSLsm6) (D) in *LSM4* or *lsm4ΔC* cells before and after hypo-osmotic shock (E) Dcp2-RFP (pMR159) localization in log phase *LSM4* and *lsm4ΔC* cells grown in SD-His and 20 minutes after osmotic shock. All experiments in this figure were performed with strains expressing non-tagged Lsm4p or Lsm4ΔCp from the native *LSM4* promoter.

of Lsm1-7p is reduced because of this C-terminal deletion, unless the assembly requirements of these two complexes are significantly different. A similar effect on mRNA degradation was reported for kLsm4ΔC in *K. lactis* (Mazzoni et al., 2003a), whereas a seemingly stronger effect was observed for kLsm4ΔC in *S. cerevisiae* (Mazzoni et al., 2003b). The latter may reflect reduced incorporation of the mutant *K. lactis* Lsm4p into the *S. cerevisiae* Lsm1-7p complex. Decker et al. did not find a significant change in the half-lives of PGK1pG or MFA2pG reporter transcripts in the absence of the C-terminal 97 aa of Lsm4p, nor did they report on increased steady-state levels of these transcripts (Decker et al., 2007). The reason for this difference remains unclear; however, the strains used in these studies were constructed in different ways and in different genetic backgrounds. We cannot formally rule out that the effect we see on the PGK1pG half-life is caused by reduced expression and/or stability of Lsm4ΔCp, as we have no antibody to compare its level with that of full-length Lsm4p. However, the absence of an effect on splicing argues against this.

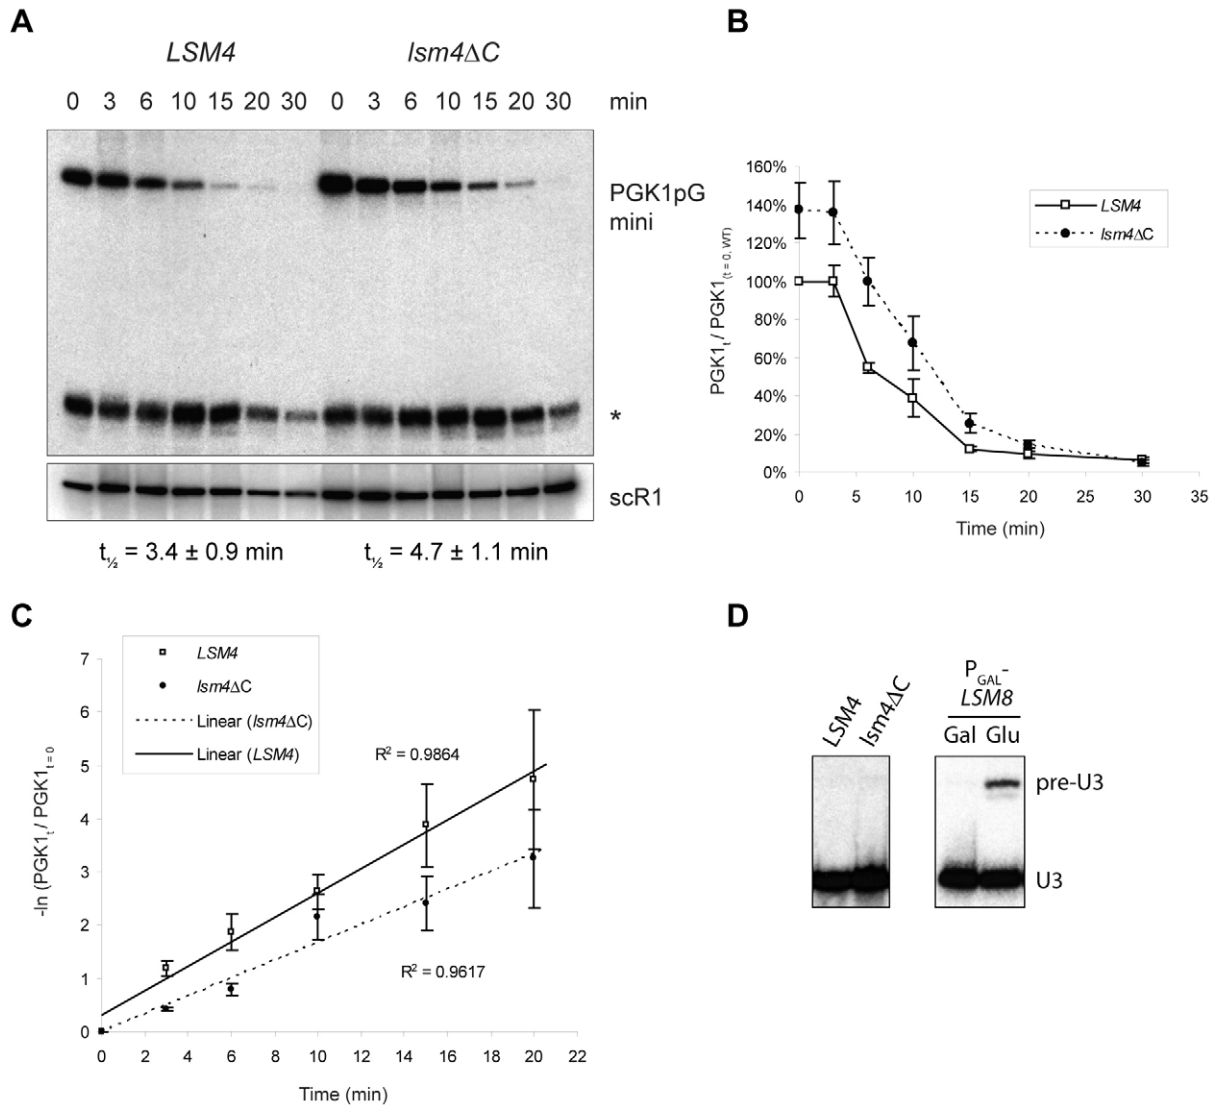

**Fig. 4** The Lsm4 C-terminus is required for efficient mRNA degradation, but not splicing. (A) Degradation of PGK1pGmini reporter transcript in *LSM4* (MRY71) or *lsm4ΔC* (MRY73) strains grown in SDGal-Ura after addition of glucose to 4% (w/v). scR1 RNA was used as a loading control. The asterisk indicates a stable degradation fragment. (B) PGK1pGmini transcript levels over time as a percentage of the level in *LSM4* cells at  $t=0$ ; averages of three northern blots with vertical bars indicating standard deviations. (C) Linearized degradation curves  $[-\ln(PGK1_t / PGK1_{t=0})]$  against time showing averages of qRT-PCR data of six RT repeats of two independent biological replicates; vertical bars indicate standard errors; half-lives indicated are based on the linearized qRT-PCR data (D) Northern blot detecting pre-U3 RNA and U3 RNA in *LSM4* and *lsm4ΔC* strains grown in YPDA, and in a  $P_{GAL}^-$ -LSM8 strain (MPS7) before and after 12 hours of growth on glucose.

#### Q/N-rich regions in other P-body components

Investigation of the aa sequences of all core components of P-bodies in yeast (Parker and Sheth, 2007) reveals Q and/or N-rich stretches of varying length in many of them, most of which are conserved between various *Saccharomyces* species (Fig. 5, Table 1 and supplementary material Fig. S6). Some (Lsm4p, Ccr4p, Pop2p and Not1p) were previously found in a genome-wide screen looking for yeast proteins with Q/N-rich domains (Michelitsch and Weissman, 2000). Michelitsch and Weissman used an algorithm to count these residues in consecutive aa 80-mers for each of the predicted open reading frames, finding an average Q/N-content of 7.7 per 80-mer in the yeast proteome (Michelitsch and Weissman, 2000). We counted Q, N and P residues in a similar fashion in each of the P-body core components. Our results (Table 1) show that all of the 20 proteins tested score above average for Q/N content

(Graphic representations are shown in Fig. 5B,C and supplementary material Fig. S6). Interestingly, some of the *Saccharomyces* homologues show further extensions of Q repeats, e.g. Edc3p, Not3p, Not4p and Not5p (supplementary material Fig. S6). In addition, many of these polypeptides contain high numbers of proline residues in or just downstream of these Q/N-rich regions (Table 1). This is a feature that is also found in other aggregation-prone proteins, e.g. huntingtin, aggregation of which causes Huntington disease (Michelitsch and Weissman, 2000). Proline-rich regions often form extended and flexible regions, in many proteins apparently reaching out to facilitate interactions with other proteins, with phosphorylation having a potential regulatory role. Binding via these proline-rich domains is generally not very specific, but can be both very rapid and strong (Williamson, 1994; Kay et al., 2000). Furthermore, proteins with Q/N-rich domains have

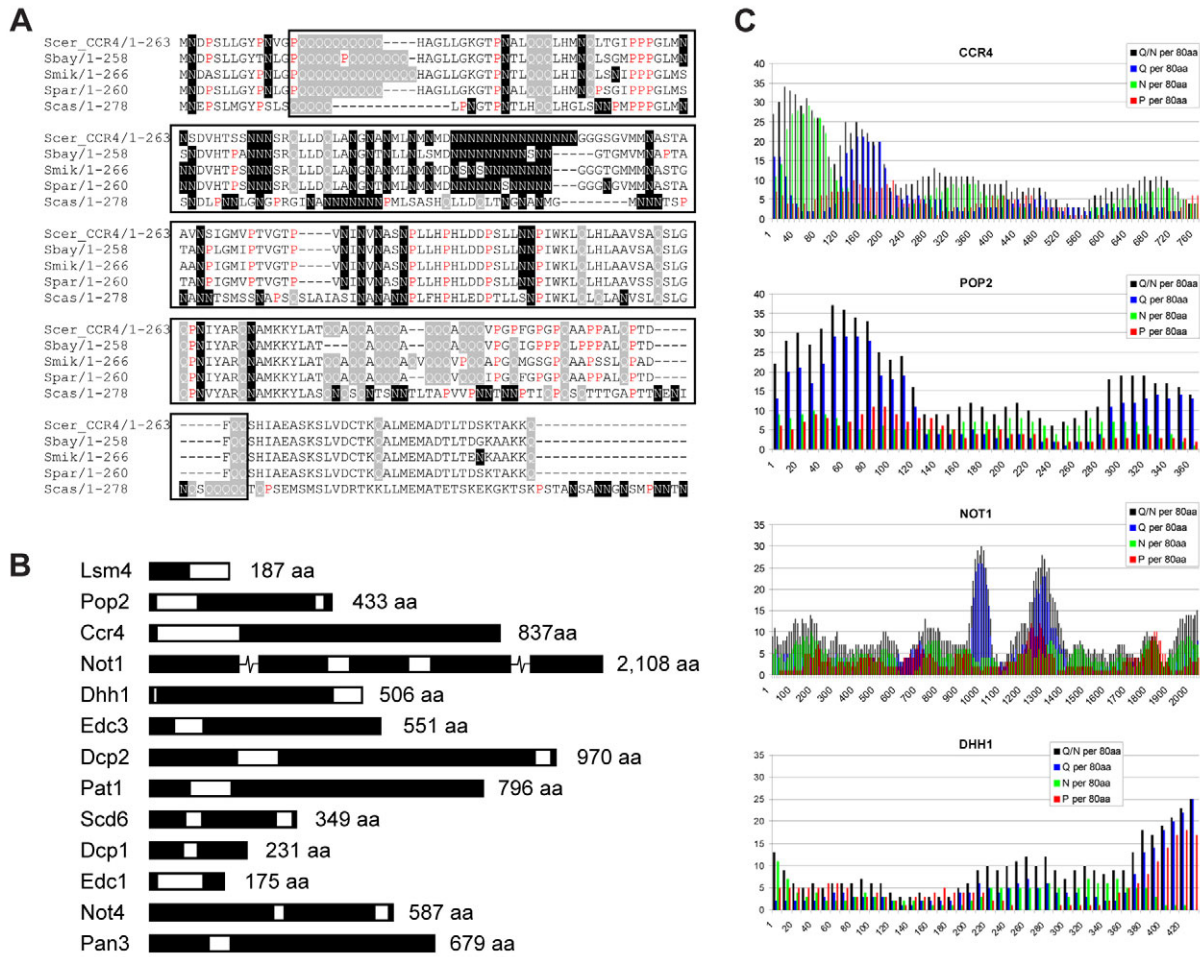

**Fig. 5** Other P-body components contain Q/N-rich regions. (A) Alignment of the N-terminal region of *S. cerevisiae* Ccr4p with homologues from closely related *Saccharomyces* species (see Fig. 1 legend for abbreviations). The Q/N-rich region is boxed, with Q residues highlighted in grey, N residues highlighted in black and P residues in red. (B) Schematic representation of P-body components with areas rich in Q and/or N residues indicated in white (approximately to scale; Not1p is broken to fit; lengths are indicated in numbers of aa). (C) Q, N and P residues were counted in aa 80-mers of Ccr4p, Pop2p, Not1p and Dhh1p starting at position 1, shifting ten aa at a time.

**Table 1. Q, N and P residues counted per amino acid 80-mers in 20 different P-body components**

| Protein | Q/N* | Q  | N  | P in Q/N-rich | P (in best 80-mer)* | Percentage of P (in best 80-mer) | P-rich close to Q/N-rich |
|---------|------|----|----|---------------|---------------------|----------------------------------|--------------------------|
| Lsm4    | 38   | 5  | 33 | 1             | 2                   | 2.5                              |                          |
| Pop2    | 37   | 29 | 8  | 6             | 12                  | 15.0                             | yes                      |
| Ccr4    | 34   | 11 | 23 | 4             | 10                  | 12.5                             | yes                      |
| Not1    | 30   | 26 | 4  | 1             | 12                  | 15.0                             | yes                      |
| Edc3    | 29   | 19 | 10 | 1             | 5                   | 6.3                              |                          |
| Dhh1    | 25   | 25 | 0  | 17            | 19                  | 23.8                             | yes                      |
| Dcp2    | 24   | 13 | 11 | 8             | 20                  | 25.0                             | yes                      |
| Pat1    | 23   | 19 | 4  | 18            | 23                  | 28.8                             | yes                      |
| Scd6    | 22   | 8  | 14 | 2             | 15                  | 18.8                             | (yes) <sup>†</sup>       |
| Dcp1    | 22   | 4  | 18 | 2             | 4                   | 5.0                              |                          |
| Edc1    | 22   | 5  | 17 | 10            | 10                  | 12.5                             | yes                      |
| Not4    | 21   | 11 | 8  | 9             | 10                  | 12.5                             | yes                      |
| Pan3    | 20   | 0  | 20 | 6             | 15                  | 18.8                             | yes                      |
| Not3    | 19   | 9  | 10 | 2             | 13                  | 16.3                             | (yes) <sup>†</sup>       |
| Not5    | 15   | 8  | 7  | 3             | 12                  | 15.0                             |                          |
| Xrm1    | 15   | 5  | 10 | 1             | 24                  | 30.0                             | (yes) <sup>†</sup>       |
| Pan2    | 15   | 7  | 8  | 2             | 10                  | 12.5                             |                          |
| Lsm1    | 14   | 8  | 6  | 1             | 2                   | 2.5                              |                          |
| Not2    | 11   | 8  | 3  | 7             | 8                   | 10.0                             |                          |
| Edc2    | 8    | 5  | 3  | 6             | 9                   | 11.3                             |                          |

\*Values indicate the number of residues in the highest scoring 80-mer for that protein.

<sup>†</sup>P-rich region near Q/N-rich region scoring <20.

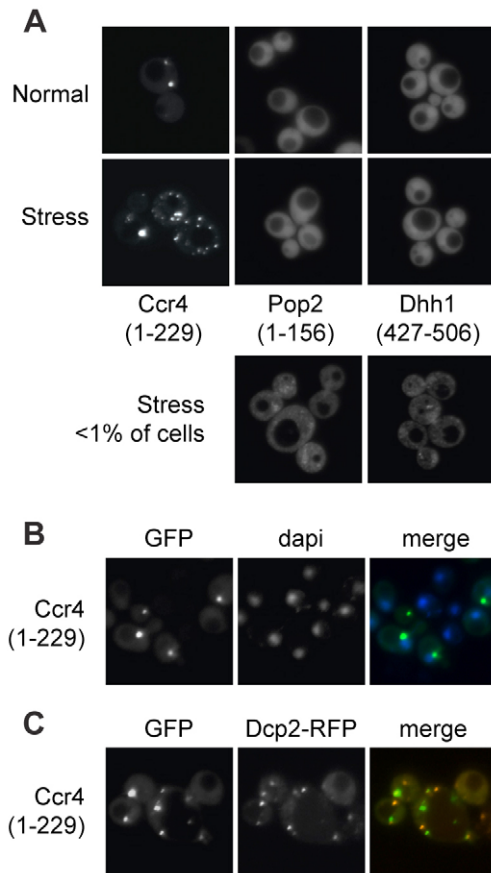

**Fig. 6** The Q/N-rich region from Ccr4p aggregates in cytoplasmic foci and responds to stress. (A) Localization of GFP-tagged Q/N-rich regions of Ccr4p (aa 1-229; pMR202), Pop2p (aa 1-156; pMR203) and Dhh1p (aa 427-506; pMR204) before and after hypo-osmotic shock (B) GFP-Ccr4(1-229) aggregates localize to the cytoplasm as shown in these fixed cells with DAPI stained nuclear DNA (C) The majority of GFP-Ccr4(1-229) aggregates does not colocalize with Dcp2-RFP (pRP1155) foci after osmotic shock.

previously been shown to promote aggregation of heterologous proteins with similar domains (Derkatch et al., 2004). Indeed, Lsm4p was found as one of nine Q/N-rich proteins that, when overproduced, promote de novo appearance of [PSI<sup>+</sup>], the prion-form of the Q/N-rich Sup35 protein (Derkatch et al., 2001). On the basis of this behaviour as well as its structural similarities to Sup35p, these authors proposed that Lsm4p itself is a prion protein. Furthermore, Decker et al. showed that the prion-like Q/N-rich domain of the Rnq1 prion protein can, at least in part, functionally replace the C-terminal prion-like domain of Lsm4p (Decker et al., 2007).

#### Q/N-rich regions affect P-body localization

It is plausible that Q, N and/or P-rich regions have a role in the accumulation of proteins in P-bodies. We tested Q/N-rich regions from Ccr4p, Pop2p and Dhh1p for their ability to aggregate and/or accumulate in P-bodies when fused to GFP. The Q/N-rich N-terminal region of Ccr4p fused to GFP [Ccr4(1-229)] aggregates in cytoplasmic foci under normal growth conditions (Fig. 6A,B) in ~20% of cells, and foci increase in numbers under stress conditions, with more than 50% of cells showing multiple foci per cell. Although the dynamics of increased focal accumulation resembled that of P-body formation, suggesting that the Q/N-rich N-terminus

of Ccr4p is sufficient for P-body localization, we found that the majority did not colocalise with Dcp2-RFP (Fig. 6C). GFP-fusions of the Q/N-rich regions of Pop2p [Pop2(1-156)] and Dhh1p [Dhh1(427-506)], however, do not aggregate under normal growth conditions but show weak focal concentration in a low percentage of cells (<1%) when stressed, although the majority of cells do not show a change in localization (Fig. 6A). However, GFP-fusions of Pop2p and Dhh1p deleted for these domains [Pop2ΔN(147-433)] and [Dhh1ΔC(1-427)] do show decreased P-body localization compared to full-length Pop2p and Dhh1p (Fig. 7A), and Ccr4p deleted for 147 aa at its N-terminus [Ccr4ΔN(148-837)] completely fails to accumulate in cytoplasmic foci under stress conditions. We quantified the P-body localization of these proteins by counting the number of visible foci per cell at a set time after osmotic shock (Table 2). These numbers are an indication of the level of P-body localization, as a reduction in P-body accumulation will lead to a reduction in the number of visible P-bodies, which generally have variable sizes and/or intensities. Interestingly, deletion of a further 102 aa from the Ccr4p N-terminus [Ccr4ΔN2(250-837)] leads to exclusively nuclear localization (Fig. 7B). The latter suggests that Ccr4p normally shuttles between the nucleus and cytoplasm, and that its nuclear export depends on sequences within the N-terminal domain. The tendency for aggregation of these Q/N-rich regions is further emphasized by the fact that full-length Pop2p expressed from the *MET25* promoter aggregates in bright nuclear foci when tagged at the C-terminus (Pop2-GFP, Fig. 7C), at a much lower rate when tagged at the (Q/N-rich) N-terminus (data not shown) and not at all in the absence of this N-terminus (Pop2ΔN-GFP, Fig. 7C). As these experiments were performed in the presence of natively expressed non-tagged proteins, which may contribute to the observed absence of GFP-Ccr4ΔN concentration in P-bodies, we investigated the localization of this protein in *ccr4Δ* as well as *xrn1Δ* strains. Whereas GFP-Ccr4ΔN still failed to concentrate in microscopically visible foci in the absence of native Ccr4p (Fig. 7D), some weak foci were observed in the absence of Xrn1p (supplementary material Fig. S7), which generally leads to larger and more abundant P-bodies by preventing 5'-to-3' degradation of transcripts. For Ccr4ΔNp and Pop2ΔNp the reduced P-body localization is not due to reduced levels of these truncated proteins as western analysis showed no difference between levels of full-length and mutant proteins (Fig. 7E). As the level of Dhh1ΔCp was only 60% of that of full-length Dhh1p we cannot rule out that its reduced P-body localization is, in part, due to the lower protein level.

In summary, although not absolutely essential, Q/N-rich sequences in Pop2p, Ccr4p and Dhh1p contribute to efficient accumulation of these proteins in P-bodies under stress conditions. This is most obvious for Ccr4p, which, in the absence of its N-terminal 147 aa is not microscopically detectable in P-bodies in otherwise normal cells. Increased focal accumulation under stress conditions of the N-terminal 229 aa fused to GFP, suggests that this region is capable of regulated aggregation in response to stress. The fact that the majority of these foci do not colocalize with Dcp2p, suggests that additional parts of Ccr4p are necessary for proper P-body localization, most probably through additional protein-protein interactions. It would therefore be interesting to further investigate the requirements of the Q/N-rich regions as well as other parts of these proteins for these interactions.

#### Is a mechanism for protein accumulation in P-bodies conserved?

As the C-terminal region of *S. cerevisiae* Lsm4p is semi-conserved between *Saccharomyces* species, at least in the high content of N

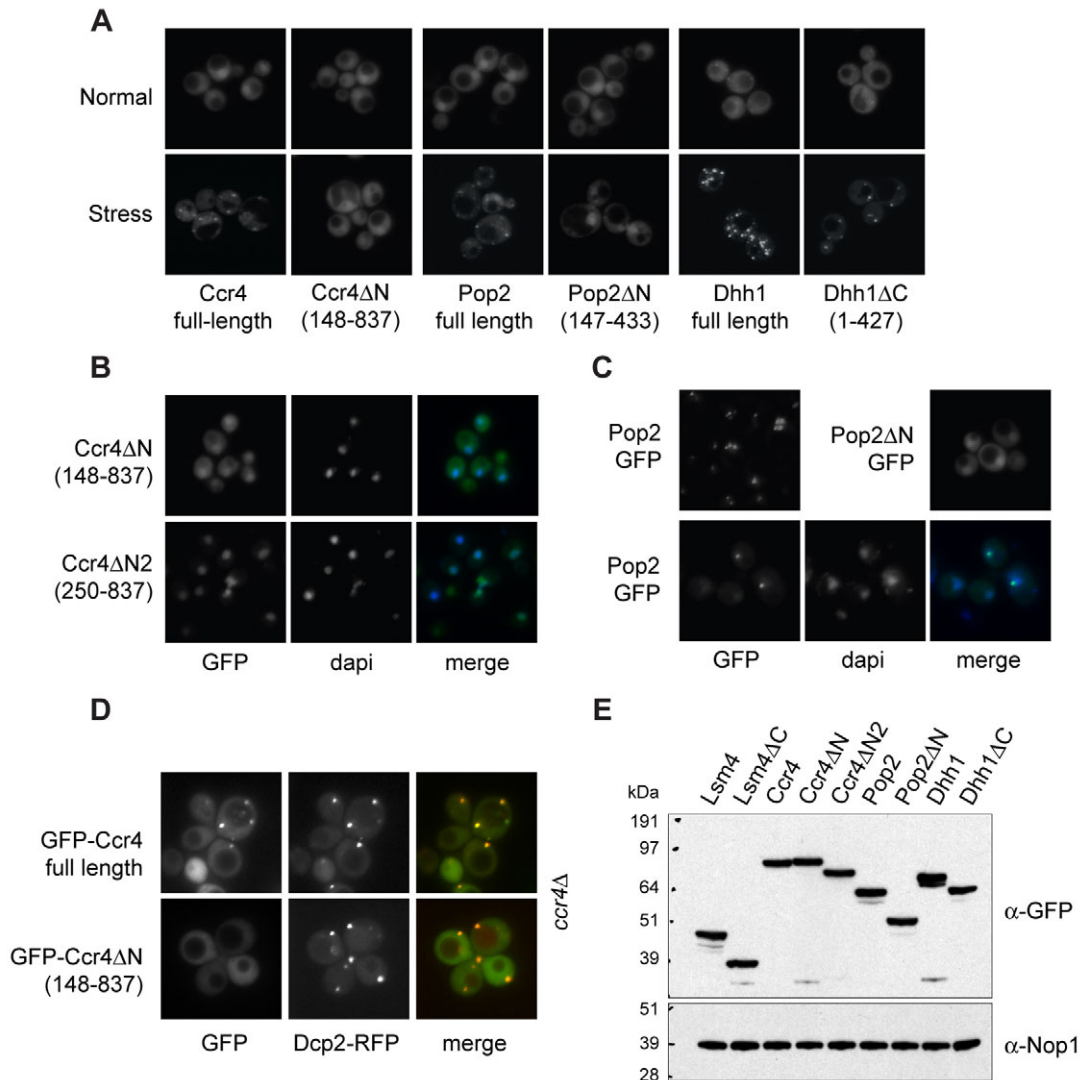

**Fig. 7** Q/N-rich regions from Ccr4p, Pop2p and Dhh1p contribute to efficient accumulation of these proteins in P-bodies. (B) Localization of GFP-tagged full-length Ccr4p (pMR212), Pop2p (pMR214), Dhh1p (pMR210) or truncated versions of these proteins (Ccr4ΔN(148-837) from pMR218, Pop2ΔN(147-433) from pMR215, Dhh1ΔC(1-427) from pMR211) before and after osmotic shock. All GFP-fusions were expressed in BY4741 cells and localization was examined in cells during normal growth (normal) or 20-40 minutes after osmotic shock (stress). (B) Localization of GFP-tagged Ccr4ΔN(148-837) and Ccr4ΔN2 (aa 250-837; pMR213) in fixed cells with DAPI-stained nuclear DNA (C) Localization of C-terminally GFP-tagged full-length Pop2p (pMR216) or Pop2ΔNp (pMR217); DAPI-stained nuclear DNA in blue. (D) Localization of GFP-Ccr4, GFP-Ccr4ΔN and Dcp2-RFP in *ccr4Δ* cells (Y10387) 30 minutes after hypo-osmotic shock (E) Anti-GFP western blot analysis of full-length and truncated Lsm4, Ccr4, Pop2 and Dhh1 proteins. Curiously, GFP-Ccr4 (122 kDa) migrates faster than GFP-Ccr4ΔN (106 kDa), but slower than GFP-Ccr4ΔN2 (95 kDa; Fig. 7E), and all three GFP-Ccr4 proteins migrate faster than their predicted molecular weights. The presence or absence of the highly polar N-terminal region of Ccr4p causes a change in the effective charge of the entire protein (predicted charges at pH 7 are -5.8, -4.0 and -5.5 respectively) and might affect protein conformation resulting in unusual migration during SDS-PAGE. Nop1p was used as a loading control.

and/or Q residues (supplementary material Fig. S1), the ability to promote Lsm1-7p accumulation in P-bodies is likely to be conserved in these yeasts as well as in other budding yeasts. In fact, this was shown to be true for the budding yeast *K. lactis* Lsm4p produced in *S. cerevisiae* (Mazzoni et al., 2007). The human homologue, however, does not show a significant enrichment in Q or N residues, apart from a short stretch of five glutamines. Indeed, full-length human LSM4 fused to GFP did not aggregate when overexpressed in wild-type yeast cells, nor did it accumulate in foci under stress conditions. Surprisingly, it mostly accumulated in the nucleus instead (data not shown). As it was not able to support viability in the absence of native Lsm4p expression (data not

shown), it might be unable to form a functional complex with yeast Lsm proteins. It is possible that residues in other human LSM1-7 complex (comprising LSM1 to LSM7) members normally contribute to its accumulation in P-bodies. Notably, the short N or C-terminal extensions of LSM1, LSM2, LSM3 and LSM7 proteins contain relatively high levels of glutamine residues. However, if, as we propose, Q/N-rich sequences contribute to a rapid response to stimuli in yeast, this may not be needed in human cells, as the LSM1-7 complex accumulates in P-bodies even under normal growth conditions.

Q/N-rich regions do not seem to be conserved in the human homologues of budding yeast Ccr4p, Pop2p and Dhh1p (CNOT6,



**Table 2. Quantification of P-body localization**

| Protein            | Foci per cell | Cells examined |
|--------------------|---------------|----------------|
| Ccr4               | 2.7±0.5       | 138            |
| Ccr4ΔN (aa148-837) | 0             | >1000          |
| Pop2               | 4.8±1.6       | 80             |
| Pop2ΔN (aa147-433) | 1.9±0.6       | 93             |
| Dhh1               | 10.7±5.3      | 35             |
| Dhh1ΔC (aa1-427)   | 3.5±1.1       | 83             |

CNOT8 and DDX6, respectively) proteins either; they are significantly shorter, lacking the N-terminal and C-terminal Q/N-rich regions respectively (supplementary material Fig. S8). Perhaps the function of these protein domains has been replaced by alternative domains, possibly in other polypeptides with which they interact. For example, GW182 contains an internal Q/P-rich region that is essential, but not sufficient, for its own P-body localization and that of Ago1 (Behm-Ansmant et al., 2006). Another P-body component specific to higher eukaryotes, Ge-1/Hedls, contains a C-terminal repetitive sequence rich in hydrophobic residues that is essential for P-body localization and parts of which aggregate in cytoplasmic foci that are not P-bodies (Yu et al., 2005). In addition EDC4 (also known as Ge-1, Hedls), DCP2 and TNRC6B from humans as well as other higher eukaryotes contain high levels of Q and/or N residues (Decker et al., 2007). Thus, alternative aggregation-prone regions might have replaced some of the yeast Q/N-rich domains in higher eukaryotes, at least some of which are likely to have a role in P-body assembly.

Aggregation of P-body components through their Q/N-rich regions could promote efficient P-body formation. Whether this is really the case and, if so, whether this occurs through prion-like aggregation or through specific interactions via putative modular 'polar zipper' protein-protein interaction domains (Perutz et al., 1994; Michelitsch and Weissman, 2000) remains to be determined. The importance of the Q/N-rich protein Edc3p (also known as Lsm16p) in combination with Lsm4p in P-body assembly in yeast, which came to light while this manuscript was being revised (Decker et al., 2007), is in support of this hypothesis. An intriguing question is how Lsm4p aggregation, and that of other P-body components, is prevented under normal growth conditions. Post-translational modifications, e.g. phosphorylation of Lsm4p or other (Lsm) proteins, probably have a role. Such modifications could allow the cell to respond quickly and efficiently to changes in conditions, and might regulate the levels and intracellular localizations of Lsm1-7p and Lsm2-8p, in addition to promoting P-body localization. Such a mechanism could also regulate the competition between these two complexes that was observed by Spiller et al. (Spiller et al., 2007b). Similarly, post-translational modifications, e.g. of the N-terminal region of Ccr4p, could allow P-body localization of other proteins involved in RNA degradation. Q-rich regions in mouse TIA-1 and PUM2 have previously been shown to contribute to protein accumulation in stress granules (Gilks et al., 2004; Vessey et al., 2006). We now show that at least some of the Q/N-rich domains in P-body components have a role in the assembly of these RNA processing bodies. The presence of Q/N-rich regions in many other proteins that are involved in various aspects of RNA metabolism (Michelitsch and Weissman, 2000; Decker et al., 2007) hints at the possibility of a more general role for these prion-like domains in functional protein aggregation, in addition to stress-granule and P-body assembly.

## Materials and Methods

### Plasmids and strains

For a complete list of plasmids and strains used see supplementary material Tables S1 and S2.

### Microscopy

Cells were grown at 30°C to mid-log phase in synthetic dropout (SD) medium. To stress cells, cultures were centrifuged and cells were resuspended in water. Live cells were placed on microscopy slides and examined by bright-field and/or fluorescence microscopy using a Leica FW4000 fluorescence microscope. Fixing of cells followed by DAPI staining was performed as previously described (Spiller et al., 2007b). Images were captured using LeicaFW4000 software (Scanalytics, Fairfax, VA) with a CH-250 16-bit, cooled CCD camera (Photometrics, Tucson, AZ).

### RNA analyses

Cultures were grown at 30°C in synthetic dropout medium containing 2% (w/v) galactose. Transcription of the PGK1pGmini reporter gene was stopped by the addition of glucose to 4% (w/v) and 20 ml culture with an OD<sub>600</sub> of 0.5 were snap-chilled at the indicated times after the addition of glucose. RNA extractions and northern blot analyses of 6% acrylamide/urea gels were as described (Mayes et al., 1999). The following oligonucleotide probes were used for northern hybridizations: to detect the PGK1pGmini reporter transcript 5'-AATTGATCTATCGAGGAATTCC-3', to detect scR1 RNA 5'-ATCCCGGCCGCCATCAC-3' and to detect U3 RNA 5'-GGTTATGGGACTCATCA-3'. Northern blots were quantified using a STORM 860 PhosphorImager and ImageQuant software (Molecular Dynamics).

### Quantitative reverse-transcriptase PCR

Ten µg of total RNA were treated with DNaseI (0.9 U RQ1, Promega) according to the manufacturer's instructions. cDNA was prepared from 5 µg of DNase-treated RNA in a 10 µl reaction: 1× first strand synthesis buffer, 2.5 mM DTT, 10 U RNase inhibitor (Roche), 0.75 mM dNTPs, 7.5 U ThermoScript RNaseH<sup>-</sup> (Invitrogen) and 500 nM of PGK1pGmini-specific primer (5'-AGCGTAAAGGATGGGGAAA-GAGAA-3'), according to the manufacturer's instructions. A negative control reaction was performed in the absence of reverse transcriptase (RT). Any remaining RNA was hydrolysed by incubating reactions for 1 hour at 37°C after addition of 15 µl of 0.1 mg/ml RNaseA (Roche). Quantitative PCRs (qPCRs) were performed with SYBR Green JumpStart Taq ReadyMix (Sigma) in a Stratagene MX3005P real-time PCR machine in 10 µl reactions: 6 µl containing 5 µl 2× SYBR Green ReadyMix, 300 nM of each primer (F: 5'-ATTGAAATGAAATGAAATCGAAGGAATTTGG-3'; R: 5'-AGCGTAAAGGATGGGGAAAAGAGAA-3') and 0.5× ROX, plus 4 µl of cDNA template (diluted 1 in 20 after RT-PCR). Cycling parameters were as follows: 2 minutes at 94°C, then 50 cycles of 10 seconds at 94°C, 10 seconds at 63°C and 20 seconds at 72°C. Each qPCR reaction was performed in triplicate for each repeat RT reaction.

### Western analysis

For crude protein extracts (Volland et al., 1994), yeast cells were lysed in 0.5 ml of 0.2 M NaOH on ice for 10 minutes, followed by TCA precipitation (final 5% w/v) for 10 minutes on ice. After centrifugation, the pellet was resuspended in 35 µl of dissociation buffer (0.1 M Tris-HCl pH 6.8, 4 mM EDTA, 4% SDS, 20% (v/v) glycerol, 2% (v/v) β-mercaptoethanol, 0.02% (w/v) BPB) and 15 µl of 1 M Tris base. Samples were heated at 95°C for 10 min before separation by SDS-PAGE. Proteins were transferred to PVDF membrane and detected with mouse anti-GFP (BD Bioscience) or anti-Nop1p antibodies, and sheep anti-mouse IgG-HRP (Amersham Bioscience).

### Polypeptide alignments

Amino acid sequences of P-body components were obtained from the *Saccharomyces* Genome Database (<http://www.yeastgenome.org/>) or the NCBI Entrez Protein database (<http://www.ncbi.nlm.nih.gov/sites/entrez>). Alignments were made using the ClustalW Multiple Sequence Alignment tool (Thompson et al., 1994) inside Jalview 2.2 (Clamp et al., 2004).

We thank Roy Parker and David Tollervey for reagents, Jon Houseley for the critical reading of the manuscript, and David Barrass, Daniela Hahn and Olivier Cordin for assistance. This work was funded by a Wellcome Trust Prize Studentship 71448 and Royal Society support to MAMR, a studentship from The Darwin Trust of Edinburgh to MPS and Wellcome Trust Grant 067311. J.D.B. is the Royal Society Darwin Trust Research Professor. M.A.M.R. designed and performed all experiments under the supervision of J.D.B., except the qPCR experiment which was performed by R.D.A.; M.P.S. first suggested a potential role for the Lsm4p C-terminus in P-body localization; M.A.M.R. and J.D.B. wrote the manuscript.

## References

- Achsel, T., Brahm, H., Kastner, B., Bachi, A., Wilm, M. and Lührmann, R. (1999). A doughnut-shaped heteromer of human Sm-like proteins binds to the 3'-end of U6 snRNA, thereby facilitating U4/U6 duplex formation in vitro. *EMBO J.* **18**, 5789-5802.
- Beckham, C., Hilliker, A., Cziko, A. M., Noueiry, A., Ramaswami, M. and Parker, R. (2008). The DEAD-Box RNA Helicase Ded1p Affects and Accumulates in Saccharomyces cerevisiae P-Bodies. *Mol. Biol. Cell* **19**, 984-993.
- Behm-Ansmant, I., Rehwinkel, J., Doerks, T., Stark, A., Bork, P. and Izaurralde, E. (2006). mRNA degradation by miRNAs and GW182 requires both CCR4:NOT deadenylase and DCP1:DCP2 decapping complexes. *Genes Dev.* **20**, 1885-1898.
- Bouveret, E., Rigaut, G., Shevchenko, A., Wilm, M. and Séraphin, B. (2000). A Sm-like protein complex that participates in mRNA degradation. *EMBO J.* **19**, 1661-1671.
- Brachmann, C. B., Davies, A., Cost, G. J., Caputo, E., Li, J., Hieter, P. and Boeke, J. D. (1998). Designer deletion strains derived from *Saccharomyces cerevisiae* S288C: a useful set of strains and plasmids for PCR-mediated gene disruption and other applications. *Yeast* **14**, 115-132.
- Brahms, H., Meheus, L., de Brabandere, V., Fischer, U. and Lührmann, R. (2001). Symmetrical dimethylation of arginine residues in spliceosomal Sm protein B/B' and the Sm-like protein Lsm4, and their interaction with the SMN protein. *RNA* **7**, 1531-1542.
- Clamp, M., Cuff, J., Searle, S. M. and Barton, G. J. (2004). The Jalview Java alignment editor. *Bioinformatics* **20**, 426-427.
- Cooper, M., Parkes, V., Johnston, L. H. and Beggs, J. D. (1995). Identification and characterization of Uss1p (Sdb23p): a novel U6 snRNA-associated protein with significant similarity to core proteins of small nuclear ribonucleoproteins. *EMBO J.* **14**, 2066-2075.
- Cougot, N., Babajko, S. and Séraphin, B. (2004). Cytoplasmic foci are sites of mRNA decay in human cells. *J. Cell Biol.* **165**, 31-40.
- Decker, C. J., Teixeira, D. and Parker, R. (2007). Edc3p and a glutamine/asparagine-rich domain of Lsm4p function in processing body assembly in *Saccharomyces cerevisiae*. *J. Cell Biol.* **179**, 437-449.
- Derkatch, I. L., Bradley, M. E., Hong, J. Y. and Liebman, S. W. (2001). Prions affect the appearance of other prions: the story of [PIN(+)]. *Cell* **106**, 171-182.
- Derkatch, I. L., Uptain, S. M., Outeiro, T. F., Krishnan, R., Lindquist, S. L. and Liebman, S. W. (2004). Effects of Q/N-rich, polyQ, and non-polyQ amyloids on the de novo formation of the [PSI<sup>+</sup>] prion in yeast and aggregation of Sup35 in vitro. *Proc. Natl. Acad. Sci. USA* **101**, 12934-12939.
- Eystathiou, T., Jakymiw, A., Chan, E. K., Séraphin, B., Cougot, N. and Fritzier, M. J. (2003). The GW182 protein colocalizes with mRNA degradation associated proteins hDcp1 and hLsm4 in cytoplasmic GW bodies. *RNA* **9**, 1171-1173.
- Gilks, N., Kedersha, N., Ayodele, M., Shen, L., Stoecklin, G., Dember, L. M. and Anderson, P. (2004). Stress granule assembly is mediated by prion-like aggregation of TIA-1. *Mol. Biol. Cell* **15**, 5383-5398.
- Hermann, H., Fabrizio, P., Raker, V. A., Foulaki, K., Hornig, H., Brahm, H. and Lührmann, R. (1995). snRNP Sm proteins share two evolutionarily conserved sequence motifs which are involved in Sm protein-protein interactions. *EMBO J.* **14**, 2076-2088.
- Ingelfinger, D., Arndt-Jovin, D. J., Lührmann, R. and Achsel, T. (2002). The human LSm1-7 proteins colocalize with the mRNA-degrading enzymes Dcp1/2 and Xrn1 in distinct cytoplasmic foci. *RNA* **8**, 1489-1501.
- Jakymiw, A., Lian, S., Eystathiou, T., Li, S., Satoh, M., Hamel, J. C., Fritzier, M. J. and Chan, E. K. (2005). Disruption of GW bodies impairs mammalian RNA interference. *Nat. Cell Biol.* **7**, 1267-1274.
- Jakymiw, A., Pauley, K. M., Li, S., Ikeda, K., Lian, S., Eystathiou, T., Satoh, M., Fritzier, M. J. and Chan, E. K. (2007). The role of GW/P-bodies in RNA processing and silencing. *J. Cell Sci.* **120**, 1317-1323.
- Kay, B. K., Williamson, M. P. and Sudol, M. (2000). The importance of being proline: the interaction of proline-rich motifs in signaling proteins with their cognate domains. *FASEB J.* **14**, 231-241.
- Liu, J., Rivas, F. V., Wohlschlegel, J., Yates, J. R., III Parker, R. and Hannon, G. J. (2005). A role for the P-body component GW182 in microRNA function. *Nat. Cell Biol.* **7**, 1261-1266.
- Mayes, A. E., Verdone, L., Legrain, P. and Beggs, J. D. (1999). Characterization of Sm-like proteins in yeast and their association with U6 snRNA. *EMBO J.* **18**, 4321-4331.
- Mazzoni, C., Mancini, P., Madeo, F., Palermo, V. and Falcone, C. (2003a). A *Kluyveromyces lactis* mutant in the essential gene KILSM4 shows phenotypic markers of apoptosis. *FEMS Yeast Res.* **4**, 29-35.
- Mazzoni, C., Mancini, P., Verdone, L., Madeo, F., Serafini, A., Herker, E. and Falcone, C. (2003b). A truncated form of KILsm4p and the absence of factors involved in mRNA decapping trigger apoptosis in yeast. *Mol. Biol. Cell* **14**, 721-729.
- Mazzoni, C., D'Addario, I. and Falcone, C. (2007). The C-terminus of the yeast Lsm4p is required for the association to P-bodies. *FEBS Lett.* **581**, 4836-4840.
- Micheli, M. D. and Weissman, J. S. (2000). A census of glutamine/asparagine-rich regions: implications for their conserved function and the prediction of novel prions. *Proc. Natl. Acad. Sci. USA* **97**, 11910-11915.
- Mitchell, P. and Tollervey, D. (2003). An NMD pathway in yeast involving accelerated deadenylation and exosome-mediated 3' 5' degradation. *Mol. Cell* **11**, 1405-1413.
- Niedenthal, R. K., Riles, L., Johnston, M. and Hegemann, J. H. (1996). Green fluorescent protein as a marker for gene expression and subcellular localization in budding yeast. *Yeast* **12**, 773-786.
- Pannone, B. K., Xue, D. and Wolin, S. L. (1998). A role for the yeast La protein in U6 snRNP assembly: evidence that the La protein is a molecular chaperone for RNA polymerase III transcripts. *EMBO J.* **17**, 7442-7453.
- Parker, R. and Sheth, U. (2007). P bodies and the control of mRNA translation and degradation. *Mol. Cell* **25**, 635-646.
- Paushkin, S., Gubitz, A. K., Massenet, S. and Dreyfuss, G. (2002). The SMN complex, an assembly of ribonucleoproteins. *Curr. Opin. Cell Biol.* **14**, 305-312.
- Perutz, M. F., Johnson, T., Suzuki, M. and Finch, J. T. (1994). Glutamine repeats as polar zippers: their possible role in inherited neurodegenerative diseases. *Proc. Natl. Acad. Sci. USA* **91**, 5355-5358.
- Pilkington, G. R. and Parker, R. (2008). Pat1 contains distinct functional domains that promote P-body assembly and activation of decapping. *Mol. Cell Biol.* **28**, 1298-1312.
- Rehwinkel, J., Behm-Ansmant, I., Gatfield, D. and Izaurralde, E. (2005). A crucial role for GW182 and the DCP1:DCP2 decapping complex in miRNA-mediated gene silencing. *RNA* **11**, 1640-1647.
- Salgado-Garrido, J., Bragado-Nilsson, E., Kandels-Lewis, S. and Séraphin, B. (1999). Sm and Sm-like proteins assemble in two related complexes of deep evolutionary origin. *EMBO J.* **18**, 3451-3462.
- Séraphin, B. (1995). Sm and Sm-like proteins belong to a large family: identification of proteins of the U6 as well as the U1, U2, U4 and U5 snRNPs. *EMBO J.* **14**, 2089-2098.
- Sheth, U. and Parker, R. (2003). Decapping and decay of messenger RNA occur in cytoplasmic processing bodies. *Science* **300**, 805-808.
- Spiller, M. P., Boon, K. L., Reijns, M. A. M. and Beggs, J. D. (2007a). The Lsm2-8 complex determines nuclear localization of the spliceosomal U6 snRNA. *Nucleic Acids Res.* **35**, 923-929.
- Spiller, M. P., Reijns, M. A. M. and Beggs, J. D. (2007b). Requirements for nuclear localization of the Lsm2-8p complex and competition between nuclear and cytoplasmic Lsm complexes. *J. Cell Sci.* **120**, 4310-4320.
- Teixeira, D. and Parker, R. (2007). Analysis of P-body assembly in *Saccharomyces cerevisiae*. *Mol. Biol. Cell* **18**, 2274-2287.
- Teixeira, D., Sheth, U., Valencia-Sanchez, M. A., Brengues, M. and Parker, R. (2005). Processing bodies require RNA for assembly and contain nontranslating mRNAs. *RNA* **11**, 371-382.
- Tharun, S., He, W., Mayes, A. E., Lennertz, P., Beggs, J. D. and Parker, R. (2000). Yeast Sm-like proteins function in mRNA decapping and decay. *Nature* **404**, 515-518.
- Tharun, S., Muhrad, D., Chowdhury, A. and Parker, R. (2005). Mutations in the *Saccharomyces cerevisiae* LSM1 gene that affect mRNA decapping and 3' end protection. *Genetics* **170**, 33-46.
- Thompson, J. D., Higgins, D. G. and Gibson, T. J. (1994). CLUSTAL W: improving the sensitivity of progressive multiple sequence alignment through sequence weighting, position-specific gap penalties and weight matrix choice. *Nucleic Acids Res.* **22**, 4673-4680.
- Verdone, L., Galardi, S., Page, D. and Beggs, J. D. (2004). Lsm proteins promote regeneration of pre-mRNA splicing activity. *Curr. Biol.* **14**, 1487-1491.
- Vessey, J. P., Vaccani, A., Xie, Y., Dahm, R., Karra, D., Kiebler, M. A. and Macchi, P. (2006). Dendritic localization of the translational repressor Pumilio 2 and its contribution to dendritic stress granules. *J. Neurosci.* **26**, 6496-6508.
- Volland, C., Urban-Grimal, D., Geraud, G. and Hagenauer-Tsapis, R. (1994). Endocytosis and degradation of the yeast uracil permease under adverse conditions. *J. Biol. Chem.* **269**, 9833-9841.
- Williamson, M. P. (1994). The structure and function of proline-rich regions in proteins. *Biochem. J.* **297** (Pt 2), 249-260.
- Yu, J. H., Yang, W. H., Gulick, T., Bloch, K. D. and Bloch, D. B. (2005). Ge-1 is a central component of the mammalian cytoplasmic mRNA processing body. *RNA* **11**, 1795-1802.
